# Supplementary material
Source: PubMed Central journal article supplement (PMC9840241)
Supplement: 12904_2022_1123_MOESM2_ESM.pdf [file 12904_2022_1123_MOESM2_ESM.pdf]

## Additional file 2

**Table S3:** Statistics on staff support for patients' self-assessment of PROMs by type of discharge and point of measurement

|                                                                              | <b>Patient groups based on reason for termination of data collection</b> |                           |                                         |                            |                             |
|------------------------------------------------------------------------------|--------------------------------------------------------------------------|---------------------------|-----------------------------------------|----------------------------|-----------------------------|
|                                                                              | <b>Regular discharge*</b><br>(n = 92)                                    | <b>Death*</b><br>(n = 15) | <b>Deteriorated health*</b><br>(n = 21) | <b>Drop-out</b><br>(n = 9) | <b>Overall</b><br>(n = 137) |
| <b>Completion first measure point at admission: n (% column))</b>            |                                                                          |                           |                                         |                            |                             |
| No support                                                                   | 29 (31.5)                                                                | 3 (20.0)                  | 3 (14.3)                                | 1 (20.0)                   | 36 (26.3)                   |
| Support                                                                      | 63 (68.5)                                                                | 12 (80.0)                 | 18 (85.7)                               | 8 (80.0)                   | 101 (73.7)                  |
| <b>Completion second measure point at 7 days or discharge: n (% column))</b> |                                                                          |                           |                                         |                            |                             |
| No support                                                                   | 20 (21.7)                                                                | 2 (13.3)                  | 1 (4.8)                                 | 0 (0.0)                    | 23 (16.8)                   |
| Support                                                                      | 52 (56.5)                                                                | 4 (26.7)                  | 11 (23.8)                               | 4 (44.4)                   | 65 (47.4)                   |
| No second measurement                                                        | 20 (21.8)                                                                | 9 (60.0)                  | 9 (71.4)                                | 5 (55.6)                   | 49 (35.8)                   |

\* For discharged patients, PROM assessment should have been carried out at discharge and therefore at least 2 measurement points were expected even if 7 days were not reached; for deceased patients or those with deteriorated health, one measure point was expected
